# Supplementary material
Source: Springer Nature journal article supplement (https://www.springermedizin.de/resource/supplementary/12947_2013_466_MOESM2_ESM.pdf/9555814)

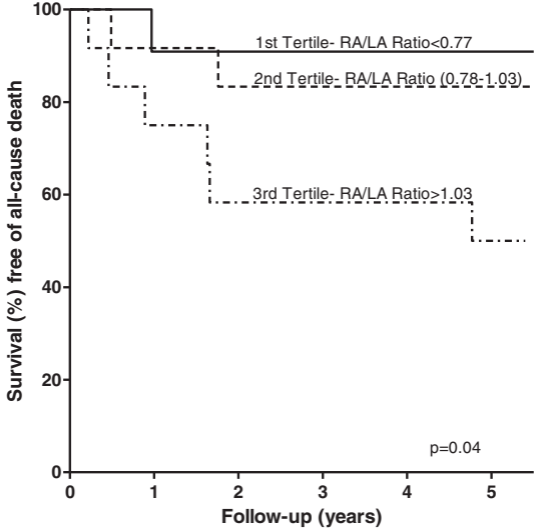

No. at Risk

|             |    |    |    |    |    |   |
|-------------|----|----|----|----|----|---|
| 1st Tertile | 12 | 12 | 11 | 11 | 11 | 8 |
|-------------|----|----|----|----|----|---|

No. at Risk

|             |    |    |    |    |    |   |
|-------------|----|----|----|----|----|---|
| 2nd Tertile | 11 | 11 | 11 | 11 | 11 | 8 |
|-------------|----|----|----|----|----|---|

No. at Risk

|             |    |    |   |   |   |   |
|-------------|----|----|---|---|---|---|
| 3rd Tertile | 12 | 10 | 8 | 8 | 8 | 5 |
|-------------|----|----|---|---|---|---|

Supplement: MOESM2 [file 9555814]
